# Supplementary material for: Supramolecular control of the structure and receptor properties of an amphiphilic hemicyanine chromoionophore monolayer at the air/water interface
Source: Royal Society of Chemistry journal article supplement (doi:10.1039/d0sm01078b), 2020-01-01
Supplement: d0sm01078b1.pdf [file d0sm01078b1.pdf]

## Electronic Supplementary Information

### Supramolecular Control of Structure and Receptor Properties of an Amphiphilic Hemicyanine Chromoionophore Monolayer at the Air/Water Interface

Alexander V. Shokurov<sup>a\*</sup>, Alvina V. Alexandrova<sup>a</sup>, Maxim A. Shcherbina<sup>b,c</sup>, Artem V. Bakirov<sup>b</sup>, Alexander V. Rogachev<sup>d</sup>, Sergey N. Yakunin<sup>d</sup>, Sergey N. Chvalun<sup>b,d</sup>, Vladimir V. Arslanov<sup>a</sup>, Sofiya L. Selektor<sup>a</sup>

<sup>a</sup> A.N. Frumkin Institute of Physical Chemistry and Electrochemistry of Russian Academy of Sciences, Leninsky pr. 31-4, Moscow, 119071 Russia

<sup>b</sup> Enkolopov Institute of Synthetic Polymeric Materials of Russian Academy of Sciences, Profsoyuznaya 70, Moscow, 117393 Russia

<sup>c</sup> Moscow Institute of Physics and Technology, 4 Institutsky line, 141700 Dolgoprudny, Moscow region, Russian Federation

<sup>d</sup> Kurchatov Institute, National Research Centre Kurchatov Institute, 1 Kurchatov square, 123098 Moscow, Russian Federation

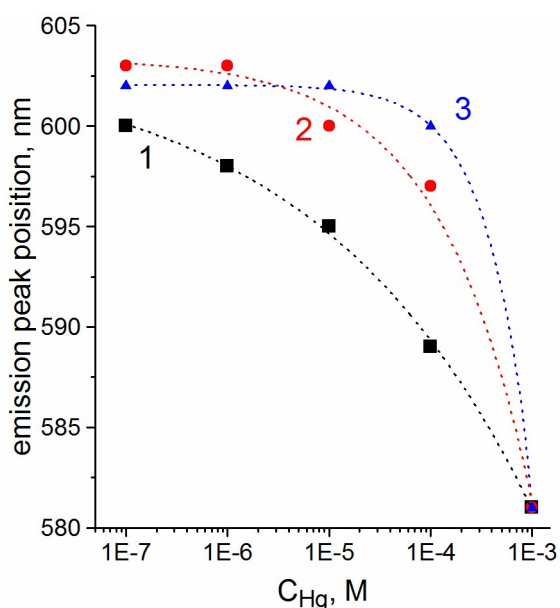

Fig. S1. Dependence of the HCS monolayer emission peak position on the amount of analyte in the subphase upon excitation at the wavelength of (1) 480, (2) 430, and (3) 370 nm, which correspond to free-form HCS, 2:1 HCS:Hg complex, and 1:1 HCS:Hg complex, respectively. The dotted lines are provided only to guide the line and have no physical meaning.

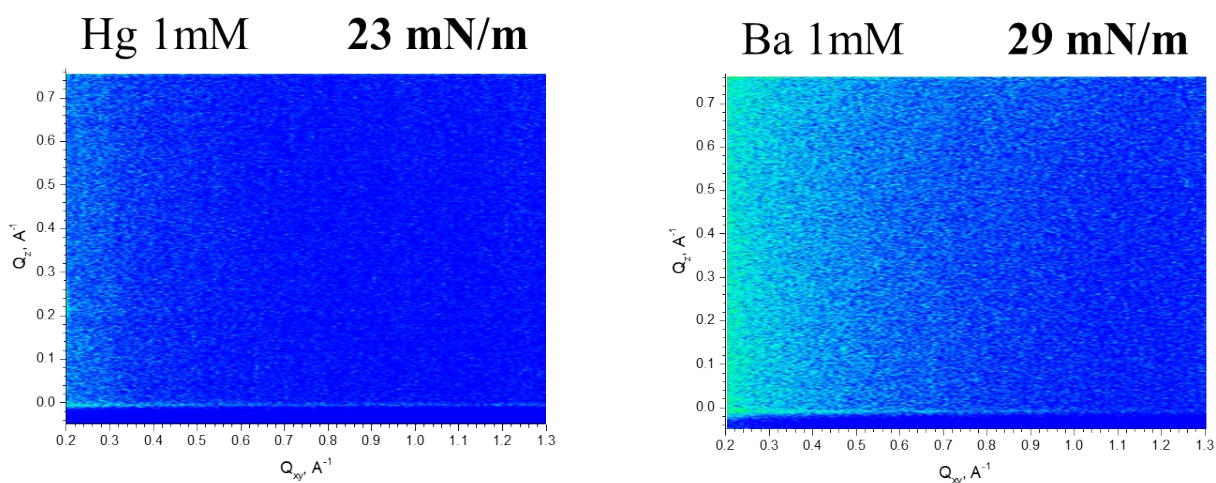

Fig. S2. GIXD patterns obtained from severely compressed HCS monolayers formed on Hg and Ba containing subphases, showing lack of crystalline ordering in the system.
